# Supplementary material for: Estimated Glomerular Filtration Rate as a Prognostic Factor in Urothelial Carcinoma of the Upper Urinary Tract: A Systematic Review and Meta-Analysis
Source: MDPI journal article supplement (doi:10.3390/jcm10184155), 2021-09-15
Supplement: s1 [file s1]

**Table S1. Assessment of quality of the non-randomized controlled trials (RCTs) using the Newcastle-Ottawa a scale for cohort studies.**

| Study    | Selection | Comparability |    |     | Outcome |    |     | Score |     |
|----------|-----------|---------------|----|-----|---------|----|-----|-------|-----|
|          | n<br>REC  | SNEC          | AE | DOI | CCB     | AO | FLO |       | AFC |
| Xylinas  | ★         | ★             | ★  |     | ★       | ★  | ★   | ★     | 7   |
| Ito      | ★         | ★             | ★  |     | ★       | ★  | ★   | ★     | 7   |
| Raman    | ★         | ★             | ★  |     | ★       | ★  | ★   | ★     | 7   |
| Morizane | ★         | ★             | ★  |     | ★       | ★  | ★   | ★     | 7   |
| Yeh      | ★         | ★             | ★  |     | ★       | ★  | ★   | ★     | 7   |
| Huang    | ★         | ★             | ★  |     | ★       | ★  | ★   | ★     | 7   |
| Xing     | ★         | ★             | ★  |     | ★       | ★  | ★   | ★     | 7   |
| Yu       | ★         | ★             | ★  |     | ★       | ★  | ★   | ★     | 7   |
| Koguchi  | ★         | ★             | ★  |     | ★       | ★  | ★   | ★     | 7   |
| Freifeld | ★         | ★             | ★  |     | ★       | ★  | ★   | ★     | 7   |
| Jan      | ★         | ★             | ★  |     | ★       | ★  | ★   | ★     | 7   |
| Kuroda   | ★         | ★             | ★  |     | ★       | ★  | ★   | ★     | 7   |
| Momota   | ★         | ★             | ★  |     | ★       | ★  | ★   | ★     | 7   |

REC: Representativeness of the exposed cohort; SNEC: Selection of the non-exposed cohort; AE: Ascertainment of exposure; DOI: Demonstration of outcome of interest; CCB: Comparability of cohorts based on design or analysis; AO: Assessment of outcome; FLO: follow-up long enough for outcomes to occur; AFC: Adequacy of follow-up of cohorts
